# Supplementary material for: Programming MOFs for water sorption: amino-functionalized MIL-125 and UiO-66 for heat transformation and heat storage applications
Source: Royal Society of Chemistry journal article supplement (doi:10.1039/c3dt51471d), 2013-01-01
Supplement: c3dt51471d.pdf [file c3dt51471d.pdf]

## Electronic Supplementary Information, ESI:

# Programming MOFs for water sorption: Amino-functionalized MIL-125 and UiO-66 for heat transformation and heat storage applications

Felix Jeremias, Vasile Lozan, Stefan Henninger, and Christoph Janiak

Emails: [felix.jeremias@ise.fraunhofer.de](mailto:felix.jeremias@ise.fraunhofer.de), [vasile.lozan@uni-duesseldorf.de](mailto:vasile.lozan@uni-duesseldorf.de),  
[vasilelozan@gmail.com](mailto:vasilelozan@gmail.com), [stefan.henninger@ise.fraunhofer.de](mailto:stefan.henninger@ise.fraunhofer.de), [janiak@hhu.de](mailto:janiak@hhu.de)

## Contents

|                                                                                                                                                      |   |
|------------------------------------------------------------------------------------------------------------------------------------------------------|---|
| Synthesis procedures: .....                                                                                                                          | 1 |
| UiO-66 [ $\text{Zr}_6(\mu_3\text{-O})_4(\mu_3\text{-OH})_4(\text{O}_2\text{C-C}_6\text{H}_4\text{-CO}_2)_{12}$ ] .....                               | 1 |
| H <sub>2</sub> N-UiO-66 [ $\text{Zr}_6(\mu_3\text{-O})_4(\mu_3\text{-OH})_4(\text{O}_2\text{C-C}_6\text{H}_3(\text{NH}_2)\text{-CO}_2)_{12}$ ] ..... | 1 |
| UiO-67 [ $\text{Zr}_6(\mu_3\text{-O})_4(\mu_3\text{-OH})_4(\text{O}_2\text{C-C}_6\text{H}_4\text{-C}_6\text{H}_4\text{-CO}_2)_{12}$ ] .....          | 2 |
| H <sub>2</sub> N-MIL-125 [ $\text{Ti}_8\text{O}_8(\text{OH})_4\text{-(O}_2\text{C-C}_6\text{H}_3(\text{NH}_2)\text{-CO}_2)_6$ ] .....                | 2 |
| Instrumentation .....                                                                                                                                | 2 |
| Powder X-ray diffractograms .....                                                                                                                    | 3 |
| N <sub>2</sub> sorption isotherms .....                                                                                                              | 5 |
| H <sub>2</sub> O sorption isotherms at 40 °C .....                                                                                                   | 7 |
| Literature .....                                                                                                                                     | 9 |

## Synthesis procedures:

Synthesis was performed by a procedure adapted from the literature.<sup>1</sup>

**UiO-66 [ $\text{Zr}_6(\mu_3\text{-O})_4(\mu_3\text{-OH})_4(\text{O}_2\text{C-C}_6\text{H}_4\text{-CO}_2)_{12}$ ]** In a 100 mL round bottom flask, ZrCl<sub>4</sub> (0.084 g, 0.343 mmol), CH<sub>3</sub>COOH (0.618 g, 10.29 mmol) and HCl (0.36 g, 10 mmol) were dissolved in DMF (20 mL). To the clear solution was added H<sub>2</sub>BDC (benzene-1,4-dicarboxylic acid, 0.057 g, 0.343 mmol). The mixture was transferred to a 100 mL Teflon-lined stainless-steel auto-clave. The system was heated for a day (24 h) at 120 °C. After 24 h, the solution was cooled to room temperature and the precipitate was isolated by centrifugation. The solid was suspended in DMF (10 mL). After standing at room temperature for 2-6 h, the solid was recovered by centrifugation. The obtained particles were washed with ethanol (10 mL) in the same way as described for washing with DMF. Finally, the solids were dried under reduced pressure.

**H<sub>2</sub>N-UiO-66 [ $\text{Zr}_6(\mu_3\text{-O})_4(\mu_3\text{-OH})_4(\text{O}_2\text{C-C}_6\text{H}_3(\text{NH}_2)\text{-CO}_2)_{12}$ ].**

Synthesis was performed as adapted from literature. In 100 mL glass flask ZrCl<sub>4</sub> (0.084 g, 0.343 mmol), C<sub>6</sub>H<sub>5</sub>COOH (1.256 g, 10.29 mmol) and HCl (0.36 g, 10 mmol) were dissolved

in DMF (20 mL). To the clear mixture solution BDC-NH<sub>2</sub> (HO<sub>2</sub>C-C<sub>6</sub>H<sub>3</sub>(NH<sub>2</sub>)-CO<sub>2</sub>H, 0.062 g, 0.343 mmol) was added. The mixture was transferred to a 100 mL PTFE-lined stainless-steel autoclave. The assembly was heated for a day (24 h) at 120°C. After 24 h, the solution was cooled to room temperature and the precipitate was isolated by centrifugation. The solid was suspended in DMF (10 mL). After standing at room temperature for 2-6 h, the suspension was centrifuged and the solvent was decanted off. The obtained particles were washed with ethanol (10 mL) in the same way as described for washing with DMF. Finally, the solids were dried under reduced pressure.

**UiO-67 [Zr<sub>6</sub>(μ<sub>3</sub>-O)<sub>4</sub>(μ<sub>3</sub>-OH)<sub>4</sub>(O<sub>2</sub>C-C<sub>6</sub>H<sub>4</sub>-C<sub>6</sub>H<sub>4</sub>-CO<sub>2</sub>)<sub>12</sub>].** In a 100 mL round-bottom flask, ZrCl<sub>4</sub> (0.120 g, 0.514 mmol), C<sub>6</sub>H<sub>5</sub>COOH (1.256 g, 10.29 mmol) and HCl (0.36 g, 10 mmol) were dissolved in DMF (20 mL). To the clear solution was added H<sub>2</sub>BPDC (Biphenyl-4,4'-dicarboxylic acid, 0.125 g, 0.514 mmol). The mixture was transferred to a 100 mL PTFE-lined stainless-steel autoclave. The assembly was heated for a day (24 h) at 120°C. After 24 h, the solution was cooled to room temperature and the precipitate was isolated by centrifugation. The solid was suspended in DMF (10 mL). After standing at room temperature for 2-6 h, the solid was recovered by centrifugation. The obtained particles were washed with ethanol (10 mL) in the same way as described for washing with DMF. Finally, the solids were dried under reduced pressure.

### **H<sub>2</sub>N-MIL-125 [Ti<sub>8</sub>O<sub>8</sub>(OH)<sub>4</sub>-(O<sub>2</sub>C-C<sub>6</sub>H<sub>3</sub>(NH<sub>2</sub>)-CO<sub>2</sub>)<sub>6</sub>]**

H<sub>2</sub>N-MIL-125 [Ti<sub>8</sub>O<sub>8</sub>(OH)<sub>4</sub>-(O<sub>2</sub>C-C<sub>6</sub>H<sub>3</sub>(NH<sub>2</sub>)-CO<sub>2</sub>)<sub>6</sub>] was prepared according to literature<sup>2</sup> from a mixture of titanium isopropoxide Ti(O<sup>i</sup>Pr)<sub>4</sub> (Acros Organics, 98%), 2-amino-terephthalic acid HO<sub>2</sub>C-C<sub>6</sub>H<sub>3</sub>(NH<sub>2</sub>)-CO<sub>2</sub>H (Aldrich, 99%), methanol (Aldrich, 99.9%) and DMF (Acros Organics, extra-dry) in a 1.5 mmol : 3 mmol : 12.5 mL : 12.5 mL ratio. The slurry was then introduced in a 100 mL PTFE-lined stainless-steel autoclave. The system was heated overnight (16 h) at 150 °C. The resulting light yellow product was filtered off, washed with DMF (10 mL) to remove the excess of unreacted organic ligand, then washed again with methanol (10 mL) for 6 h to exchange DMF with methanol, which is easily removable by moderate heating.

## **Instrumentation**

**Powder X-ray diffractograms** were acquired at ambient temperature on a Bruker D2 Phaser using a flat sample holder and Cu-Kα radiation (λ = 1.54182 Å) at 30 kV covering 2θ angles 5-80° over a time of 2 h, that is. 0.01°/sec. Diffractograms were obtained on flat layer sample holders where at low angle the beam spot is strongly broadened so that only a fraction of the reflected radiation reaches the detector which leads to the low relative intensities measured at 2θ < 10°.

**Nitrogen adsorption isotherms** were acquired on a Quantachrome Nova<sup>®</sup>, w/ 24h degassing at a temperature of 120°C *in vacuo* prior to each measurement.

**Water adsorption isotherms** were acquired on a *Quantachrome* Hydrosorb<sup>®</sup> volumetric water sorption analyzer, w/ 24h degassing at a temperature of 120°C *in vacuo* prior to each measurement.

**Cycling experiments** were performed in a *Setaram*<sup>®</sup> TGA-DSC 111. A humidified argon gas flow (5.6 kPa H<sub>2</sub>O vapour pressure) was generated by a *Setaram* WetSys<sup>®</sup> humidity controller and was continuously passed through the sample chamber.

### Powder X-ray diffractograms

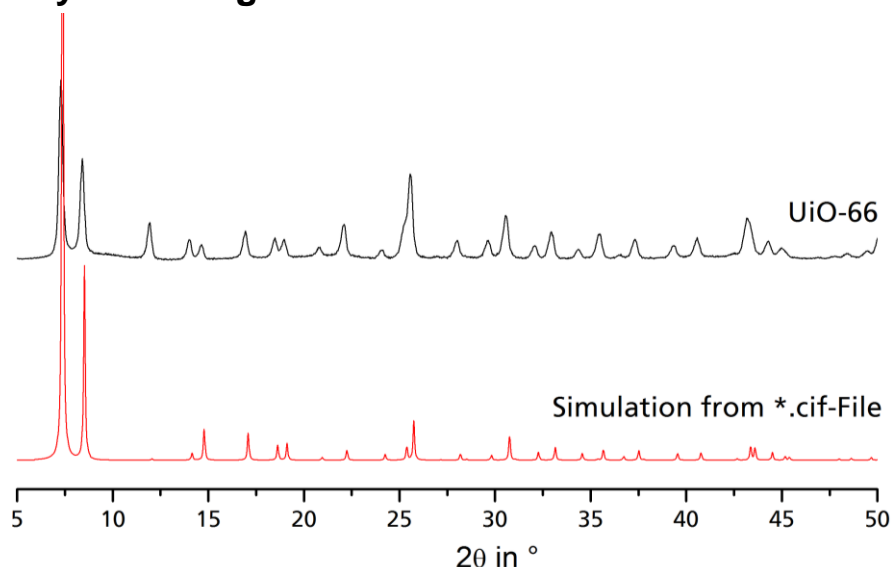

**Figure S1** Powder X-ray diffractogram of UiO-66. \*) Simulated pattern from cif-File for CCDC 837796 for comparison.<sup>3</sup> Note that at low angle the beam spot is strongly broadened on the flat layer sample holder so that only a fraction of the reflected radiation reaches the detector which leads to the lower than simulated relative intensities measured at  $2\theta < \sim 10^\circ$ .

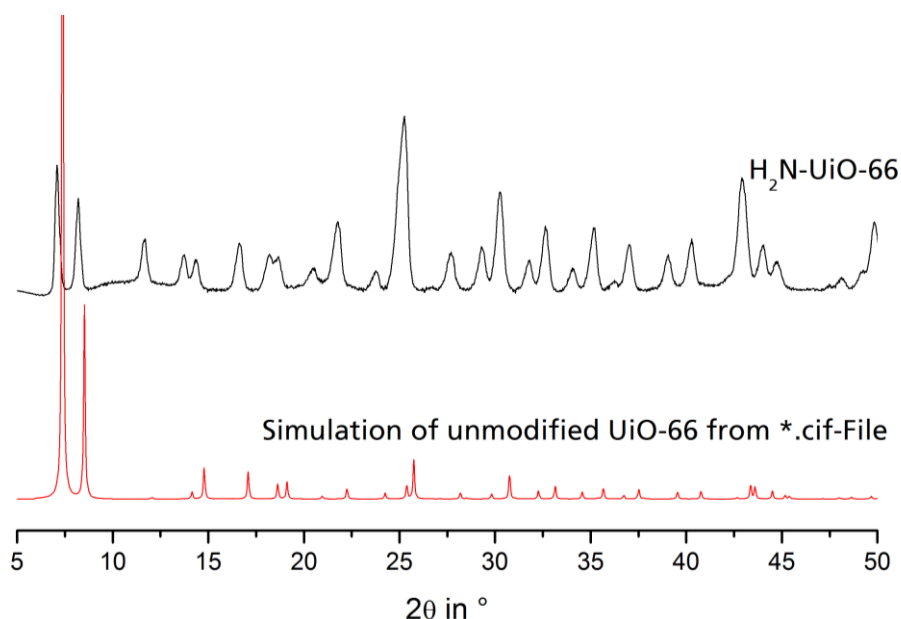

**Figure S2** Powder X-ray diffractogram of H<sub>2</sub>N-UiO-66. \*) Simulated pattern from cif-File CCDC 837796 due to not-existing X-ray structure for the H<sub>2</sub>N-modified material, therefore, the two patterns differ. Note that at low angle the beam spot is strongly broadened on the flat layer sample holder so that only a fraction of the reflected radiation reaches the detector which leads to the lower than simulated relative intensities measured at  $2\theta < \sim 10^\circ$ .

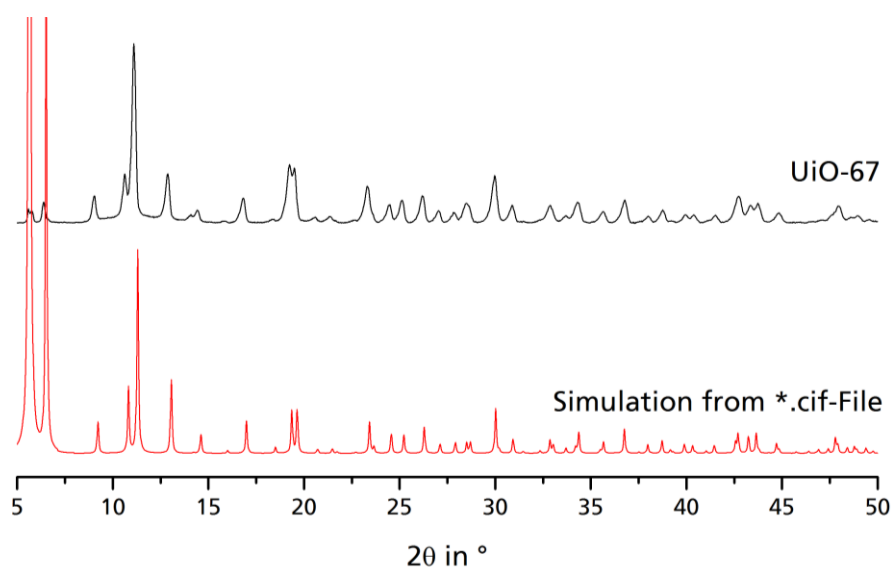

**Figure S3** Powder X-ray diffractogram of UiO-67. \*) Simulated pattern from cif-File for comparison.<sup>4</sup> Note that at low angle the beam spot is strongly broadened on the flat layer sample holder so that only a fraction of the reflected radiation reaches the detector which leads to the lower than simulated relative intensities measured at  $2\theta < \sim 10^\circ$ .

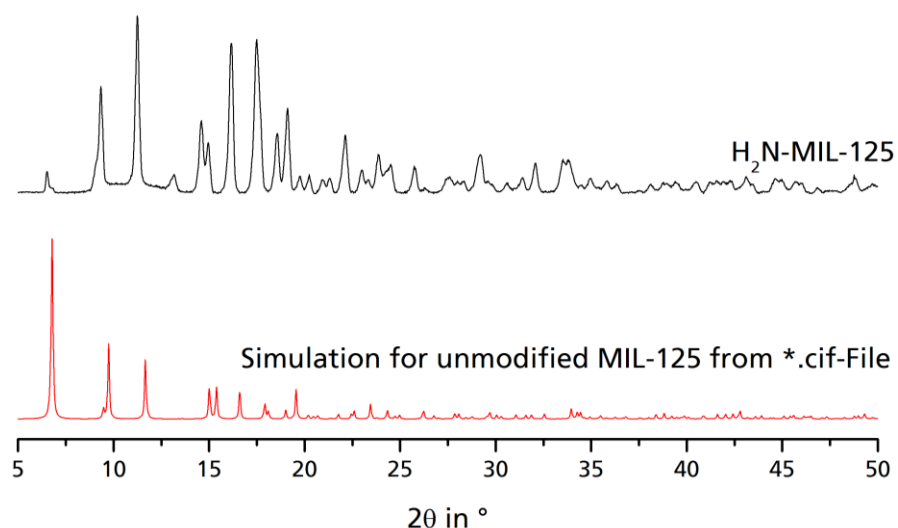

**Figure S4** Powder X-ray diffractogram of H<sub>2</sub>N-MIL-125. \*) Simulation for unmodified MIL-125 from cif-file CCDC 751157 for comparison (M. Dan-Hardi, C. Serre, T. Frot, L. Rozes, G. Maurin, C. Sanchez and G. Férey, *J. Am. Chem. Soc.*, 2009, **131**, 10857-10859.) due to not-existing X-ray structure for the H<sub>2</sub>N-modified material, therefore, the two patterns differ. Note that at low angle the beam spot is strongly broadened on the flat layer sample holder so that only a fraction of the reflected radiation reaches the detector which leads to the lower than simulated relative intensities measured at  $2\theta < \sim 10^\circ$ .

## N<sub>2</sub> sorption isotherms

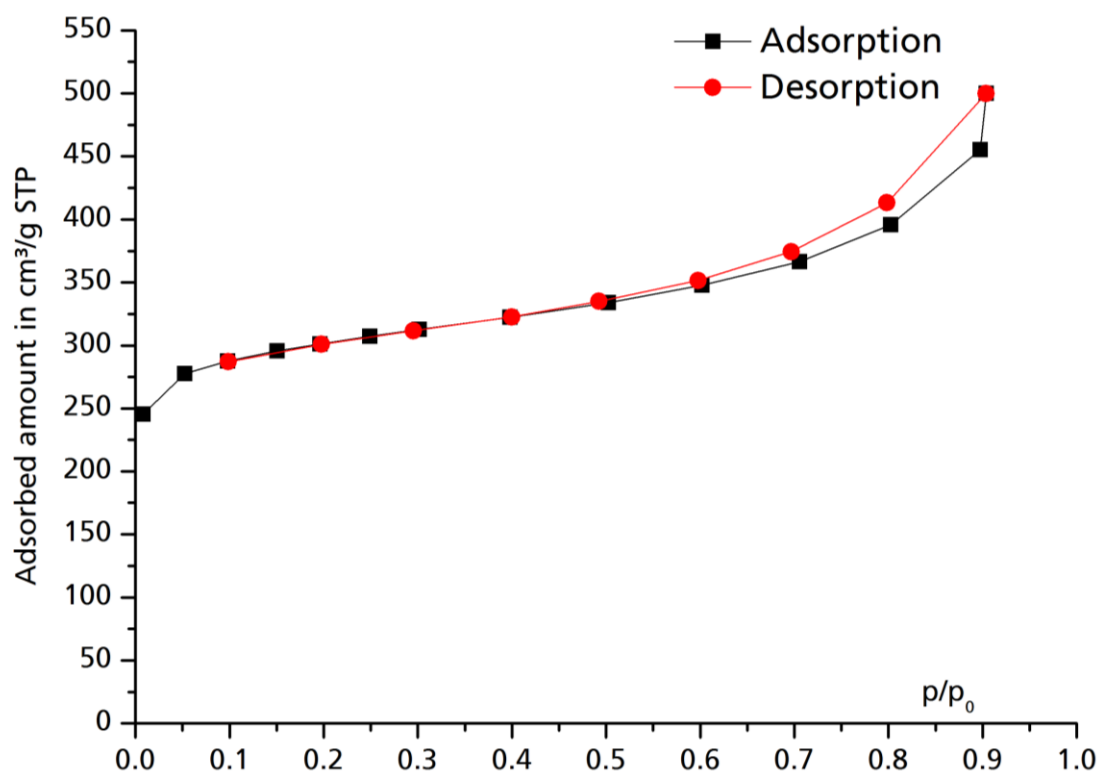

**Figure S5** N<sub>2</sub> ad-/desorption isotherm of UiO-66, acquired at 77 K. The rise of the isotherm in the  $p/p_0 > 0.6$  region, combined with the occurrence of desorption hysteresis, points to the presence of additional, mesoporous cavities (probably interparticle volume).

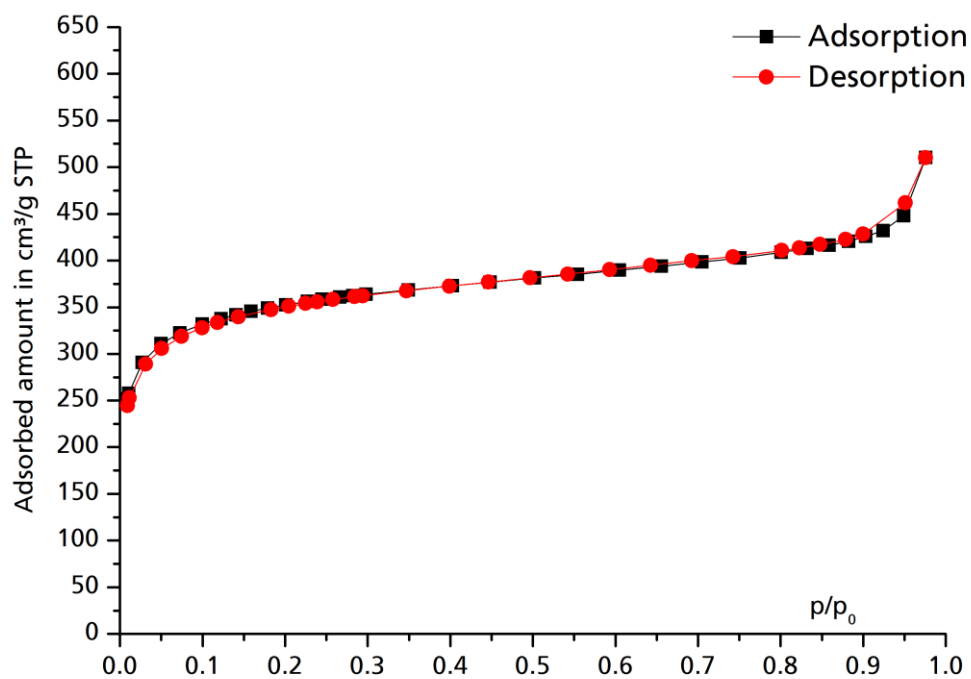

**Figure S6** N<sub>2</sub> ad-/desorption isotherm of H<sub>2</sub>N-UiO-66, acquired at 77 K.

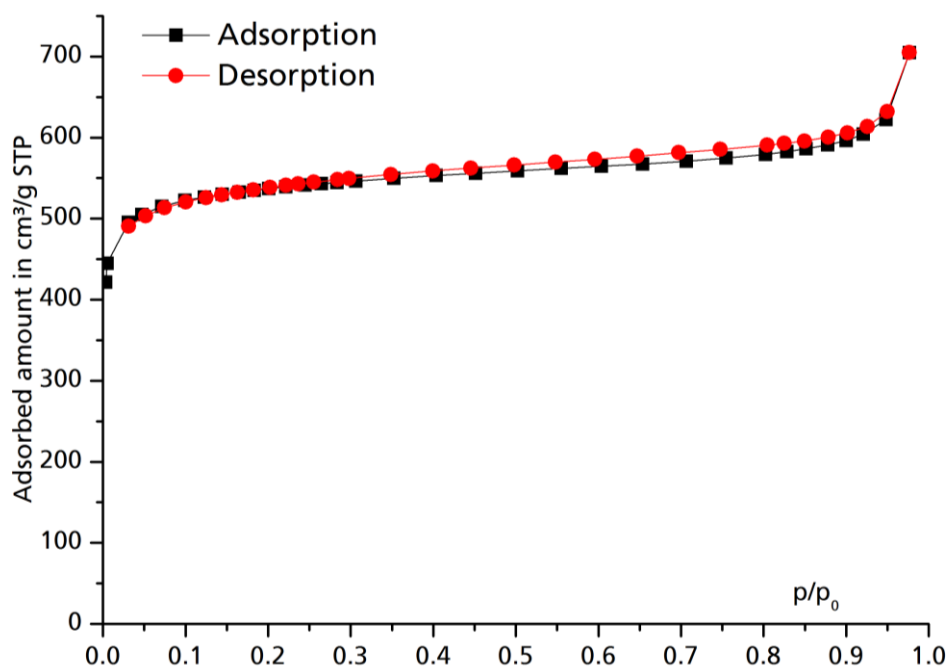

**Figure S7** N<sub>2</sub> ad-/desorption isotherm of UiO-67, acquired at 77 K.

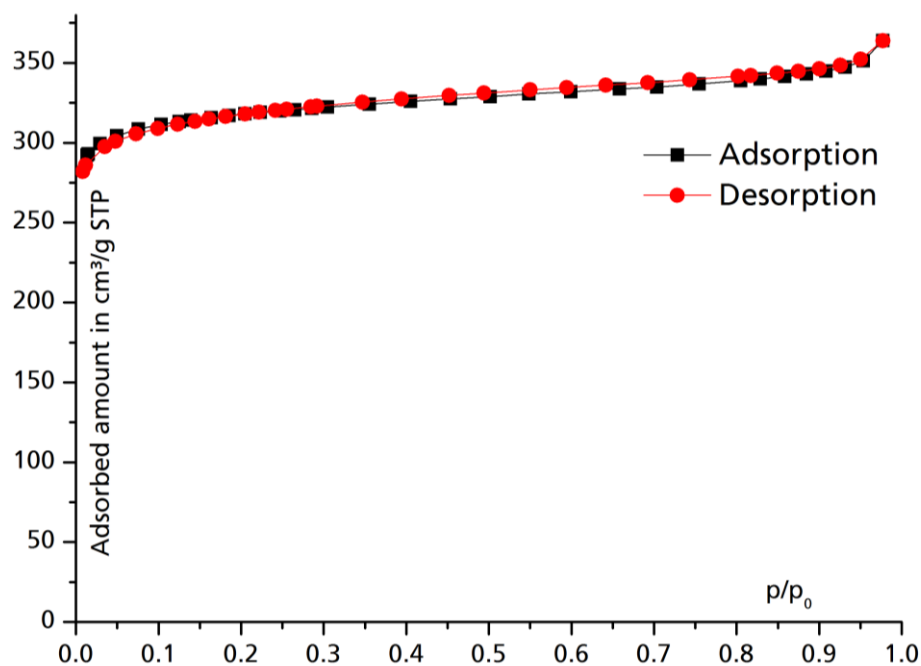

**Figure S8**  $N_2$  ad-/desorption isotherm of  $H_2N$ -MIL-125, acquired at 77 K.

## $H_2O$ sorption isotherms at 40 °C

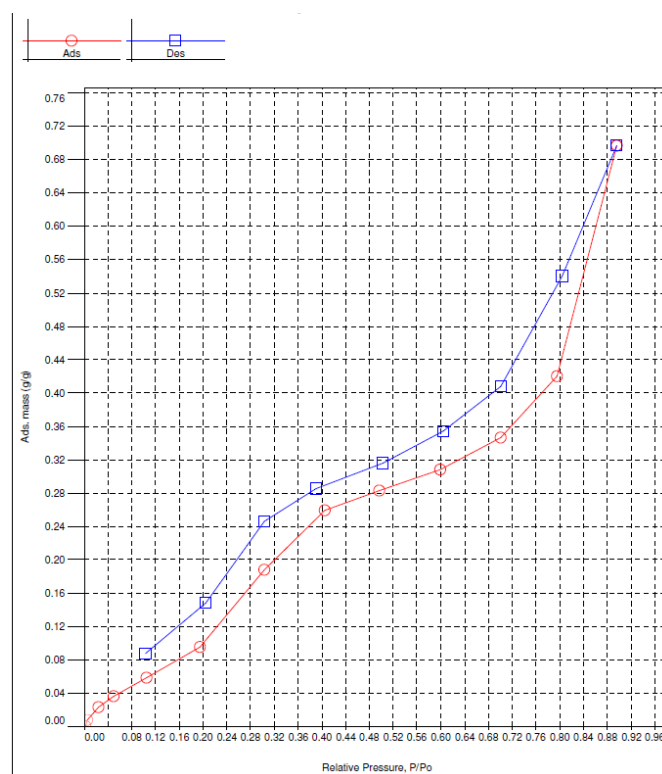

**Figure S9**  $H_2O$  adsorption/desorption isotherm of UiO-66 at 40 °C.

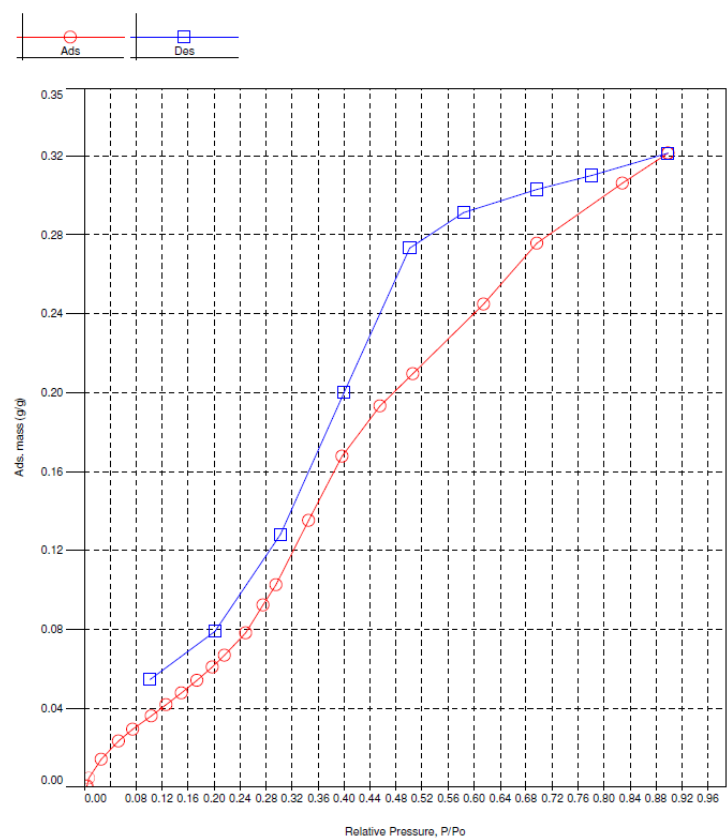

**Figure S10** H<sub>2</sub>O adsorption/desorption isotherm of H<sub>2</sub>N-UiO-66 at 40 °C.

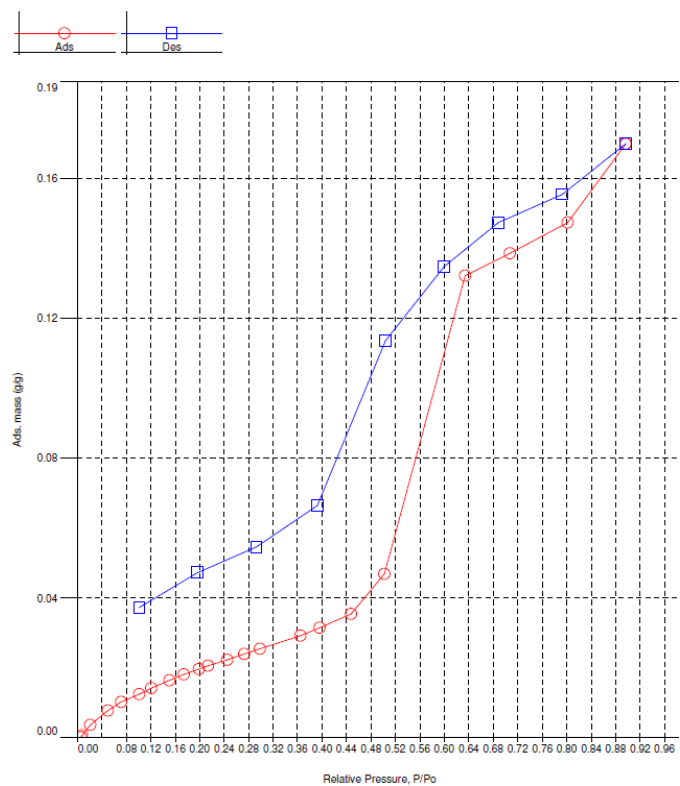

**Figure S11** H<sub>2</sub>O adsorption/desorption isotherm of UiO-67 at 40 °C.



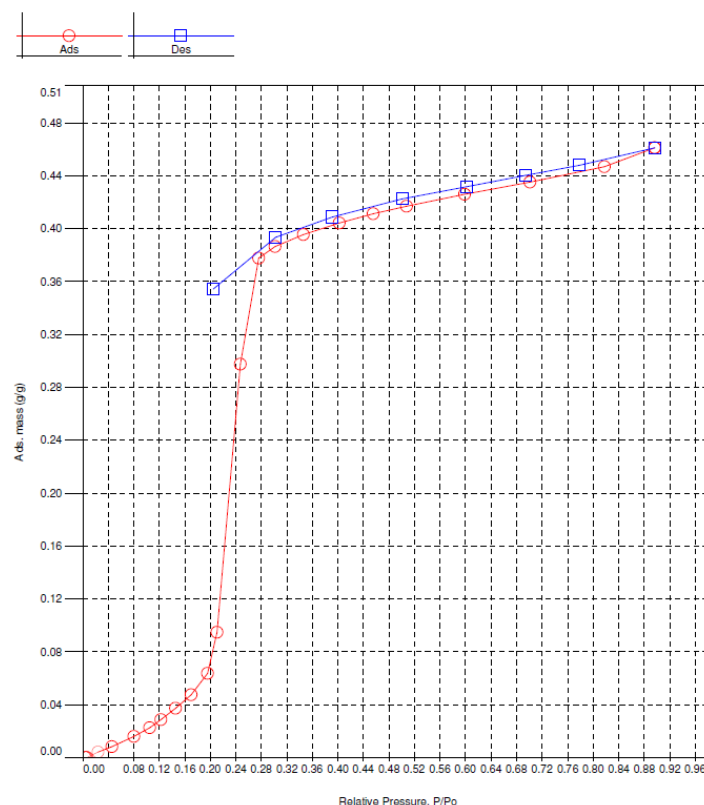

**Figure S12** H<sub>2</sub>O adsorption/desorption isotherm of H<sub>2</sub>N-MIL-125 at 40 °C.

## Literature

1. A. Schaate, P. Roy, A. Godt, J. Lippke, F. Waltz, M. Wiebcke and P. Behrens, *Chemistry*, 2011, **17**, 6643-6651.
2. C. Volkringer, T. Loiseau, M. Haouas, F. Taulelle, D. Popov, M. Burghammer, C. Riekell, C. Zlotea, F. Cuevas, M. Latroche, D. Phanon, C. Knöfelv, P. L. Llewellyn and G. r. Férey, *Chem. Mater.*, 2009, **21**, 5783-5791.
3. L. Valenzano, B. Civalleri, S. Chavan, S. Bordiga, M. H. Nilsen, S. Jakobsen, K. P. Lillerud and C. Lamberti, *Chem. Mater.*, 2011, **23**, 1700-1718.
4. Q. Yang, V. Guillerm, F. Ragon, A. D. Wiersum, P. L. Llewellyn, C. Zhong, T. Devic, C. Serre and G. Maurin, *Chem. Commun.*, 2012, **48**, 9831-9833.
